# Supplementary material
Source: PubMed Central journal article supplement (PMC4195419)
Supplement: jn.114.197624_nutrition197624SupplementaryData1.pdf [file jn.114.197624_nutrition197624SupplementaryData1.pdf]

**Online Supporting Material**

**Supplemental Table 1:** Participant characteristics at screening<sup>1</sup>

|                                | Screening value |
|--------------------------------|-----------------|
| N, <i>M/F</i>                  | 47/111          |
| Age, <i>y</i>                  | 38 ± 12         |
| Weight, <i>kg</i>              | 94.8 ± 15.0     |
| BMI, <i>kg/m<sup>2</sup></i>   | 33.9 ± 3.8      |
| Body fat, %                    | 41.9 ± 6.9      |
| Waist circumference, <i>cm</i> | 104 ± 11        |
| SBP, <i>mm Hg</i>              | 119 ± 13        |
| DBP, <i>mm Hg</i>              | 71 ± 10         |
| TG, <i>mmol/L</i>              | 1.65 ± 0.87     |
| TC, <i>mmol/L</i>              | 4.77 ± 0.85     |
| LDL-C, <i>mmol/L</i>           | 2.87 ± 0.70     |
| HDL-C, <i>mmol/L</i>           | 0.50 ± 0.11     |
| Glucose, <i>mmol/L</i>         | 5.23 ± 0.46     |
| Insulin, <i>pmol/L</i>         | 124 ± 46        |
| HOMA-IR                        | 4.2 ± 1.7       |

<sup>1</sup>Values are mean ± SD.

**Supplemental Table 2.** Body weight, waist circumference, glucose metabolism, and plasma lipid and lipoprotein concentrations in overweight and obese adults after consuming 4-wk of the baseline diet, prior to the start of the experimental diets<sup>1</sup>

|                                                                               | High Protein              |                           |                          | Moderate Protein          |                          | P value <sup>2</sup> |
|-------------------------------------------------------------------------------|---------------------------|---------------------------|--------------------------|---------------------------|--------------------------|----------------------|
|                                                                               | Control                   | High SF                   | Low SF                   | High SF                   | Low SF                   |                      |
| Sample, M/F                                                                   | 8/23                      | 8/24                      | 16/20                    | 5/24                      | 10/20                    |                      |
| Weight, kg                                                                    | 90.4 ± 15.4               | 92.4 ± 19.3               | 98.4 ± 15.2              | 95.8 ± 11.1               | 95.4 ± 11.7              | 0.35                 |
| BMI, kg/m <sup>2</sup>                                                        | 32.9 ± 3.6                | 33.1 ± 4.5                | 33.7 ± 3.8               | 35.0 ± 3.9                | 34.0 ± 3.0               | 0.27                 |
| Body fat, %                                                                   | 42.3 ± 6.4                | 42.5 ± 7.2                | 40.2 ± 7.24              | 44.6 ± 6.4                | 41.1 ± 7.6               | 0.68                 |
| Waist, cm                                                                     | 100 ± 10                  | 102 ± 13                  | 106 ± 11                 | 103 ± 10                  | 103 ± 8                  | 0.53                 |
| Glucose, mmol/L                                                               | 4.72 ± 0.41               | 4.81 ± 0.53               | 4.82 ± 0.67              | 4.69 ± 0.57               | 5.09 ± 0.65              | 0.09                 |
| Insulin <sup>3</sup> , pmol/L                                                 | 89.6 ± 43.8               | 90.3 ± 36.8               | 84.7 ± 38.2              | 94.5 ± 34.7               | 97.9 ± 51.4              | 0.70                 |
| S <sub>I</sub> <sup>3</sup> , x 10 <sup>-5</sup> min <sup>-1</sup> per pmol/L | 2.4 ± 1.2                 | 3.1 ± 1.6                 | 3.2 ± 1.9                | 2.7 ± 2.1                 | 3.3 ± 2.5                | 0.16                 |
| AIRg <sup>3</sup> , pmol/L x 10 min                                           | 637 ± 570                 | 515 ± 270                 | 515 ± 375                | 701 ± 413                 | 413 ± 316                | 0.13                 |
| DI <sup>3</sup>                                                               | 1310 ± 899                | 1625 ± 1902               | 1266 ± 782               | 1355 ± 1054               | 1067 ± 748               | 0.47                 |
| MCRi, L/min                                                                   | 6.1 ± 2.5                 | 6.7 ± 2.5                 | 7.4 ± 4.1                | 5.9 ± 2.7                 | 6.0 ± 2.4                | 0.16                 |
| TG <sup>3</sup> , mmol/L                                                      | 1.65 ± 0.73               | 1.47 ± 0.75               | 1.70 ± 1.28              | 1.50 ± 0.67               | 1.74 ± 0.85              | 0.76                 |
| TC, mmol/L                                                                    | 4.45 ± 0.78 <sup>ab</sup> | 4.17 ± 0.78 <sup>ab</sup> | 4.07 ± 0.75 <sup>b</sup> | 4.27 ± 0.78 <sup>ab</sup> | 4.66 ± 0.91 <sup>a</sup> | 0.03                 |
| LDL-C, mmol/L                                                                 | 2.75 ± 0.62               | 2.51 ± 0.70               | 2.46 ± 0.60              | 2.56 ± 0.62               | 2.87 ± 0.75              | 0.08                 |
| HDLC, mmol/L                                                                  | 0.96 ± 0.20               | 0.99 ± 0.22               | 0.87 ± 0.22              | 1.01 ± 0.21               | 1.00 ± 0.20              | 0.15                 |
| ApoB, mmol/L                                                                  | 0.79 ± 0.14               | 0.74 ± 0.15               | 0.75 ± 0.13              | 0.75 ± 0.15               | 0.83 ± 0.17              | 0.08                 |
| ApoAI, mmol/L                                                                 | 1.00 ± 0.14               | 1.01 ± 0.14               | 0.94 ± 0.15              | 1.02 ± 0.13               | 1.03 ± 0.13              | 0.16                 |
| Lipoprotein(a) <sup>3</sup> , μmol/L                                          | 4.43 ± 4.37               | 4.73 ± 5.19               | 6.10 ± 5.58              | 5.20 ± 4.91               | 4.96 ± 6.92              | 0.70                 |
| Total LDL <sup>3</sup> , nmol/L                                               | 1463 ± 362                | 1330 ± 364                | 1308 ± 375               | 1303 ± 411                | 1501 ± 468               | 0.12                 |
| Large LDL <sup>3</sup> , nmol/L                                               | 623 ± 206                 | 600 ± 220                 | 605 ± 247                | 637 ± 262                 | 632 ± 202                | 0.90                 |
| Medium LDL <sup>3</sup> , nmol/L                                              | 303 ± 117                 | 271 ± 103                 | 264 ± 122                | 270 ± 110                 | 323 ± 125                | 0.12                 |
| Small LDL <sup>3</sup> , nmol/L                                               | 290 ± 165                 | 252 ± 156                 | 234 ± 143                | 225 ± 161                 | 321 ± 203                | 0.13                 |
| Very small LDL <sup>3</sup> , nmol/L                                          | 248 ± 176                 | 207 ± 140                 | 205 ± 151                | 171 ± 93                  | 225 ± 135                | 0.27                 |
| LDL peak diameter, nm                                                         | 21.7 ± 0.6                | 21.8 ± 0.6                | 21.8 ± 0.7               | 21.9 ± 0.5                | 21.7 ± 0.5               | 0.73                 |

<sup>1</sup>Values are mean ± SD. AIRg, acute insulin reponse to glucose; DI, disposition index; MCRi, metabolic clearance rate of insulin; S<sub>I</sub>, insulin sensitivity index.

<sup>2</sup>Calculated from one-way ANCOVA comparing all 5 diets adjusted for sex, where p-value refers to the equality of the groups. Means

## Online Supporting Material

within a row without a common letter are significantly different,  $P < 0.05$ .

<sup>3</sup>ANCOVA were repeated using the log-transformed data and the levels of significance was only negligibly improved.

**Supplemental Table 3.** Changes in plasma apolipoproteins B, AI, and LDL subclass concentrations in overweight and obese adults after 4-wk of consuming diets containing different levels of protein and saturated fat, adjusted for sex<sup>1</sup>

|                               | Control      | High Protein |              | Moderate Protein |              | Mean difference for protein and SF fat effects (95% CI) <sup>2</sup> |                     |
|-------------------------------|--------------|--------------|--------------|------------------|--------------|----------------------------------------------------------------------|---------------------|
|                               |              | High SF      | Low SF       | High SF          | Low SF       | High-Mod Protein                                                     | High-Low SF         |
|                               | N=31         | N=35         | N=35         | N=36             | N=36         |                                                                      |                     |
| ApoB, <i>mmol/L</i>           | -0.02 ± 0.01 | -0.03 ± 0.01 | -0.05 ± 0.01 | -0.03 ± 0.02     | -0.02 ± 0.01 | -0.01 (-0.04, 0.02)                                                  | 0.00 (-0.03, 0.03)  |
| ApoAI, <i>mmol/L</i>          | 0.00 ± 0.02  | -0.03 ± 0.02 | -0.01 ± 0.01 | 0.02 ± 0.02      | 0.00 ± 0.02  | -0.03 (-0.06, 0.01)                                                  | 0.00 (-0.03, 0.03)  |
| Lipoprotein(a), <i>μmol/L</i> | -0.03 ± 0.29 | 0.45 ± 0.29  | 0.88 ± 0.28  | 0.48 ± 0.31      | 0.65 ± 0.30  | 0.10 (-0.47, 0.68)                                                   | -0.30 (-0.88, 0.28) |
| Total LDL, <i>nmol/L</i>      | -8 ± 57      | -100 ± 42    | -25 ± 47     | 10 ± 55          | -58 ± 59     | -55 (-160, 51)                                                       | 7 (-96, 111)        |
| Large LDL, <i>nmol/L</i>      | 32 ± 36      | 17 ± 36      | 19 ± 34      | 47 ± 38          | -39 ± 37     | -14 (-57, 84)                                                        | 42 (-29, 113)       |
| Medium LDL, <i>nmol/L</i>     | 8 ± 16       | -18 ± 15     | -17 ± 15     | 5 ± 16           | -6 ± 16      | -17 (-48, 13)                                                        | 5 (-26, 36)         |
| Small LDL, <i>nmol/L</i>      | -18 ± 21     | -45 ± 20     | -26 ± 19     | -15 ± 22         | -3 ± 21      | -26 (-66, 14)                                                        | -16 (-56, 25)       |
| Very small LDL, <i>nmol/L</i> | -28 ± 18     | -51 ± 18     | -10 ± 17     | -19 ± 19         | -12 ± 19     | -15 (-50, 21)                                                        | -24 (-60, 12)       |
| LDL peak diam, <i>nm</i>      | 0.1 ± 0.1    | 0.2 ± 0.1    | 0.1 ± 0.1    | 0.1 ± 0.1        | 0.0 ± 0.1    | 0.1 (-0.0, 0.2)                                                      | 0.1 (-0.0, 0.2)     |

<sup>1</sup>Values are mean ± SE.  
<sup>2</sup>Mean differences and 95% CI for comparison of high vs. moderate protein and comparison of high vs. low saturated fat.

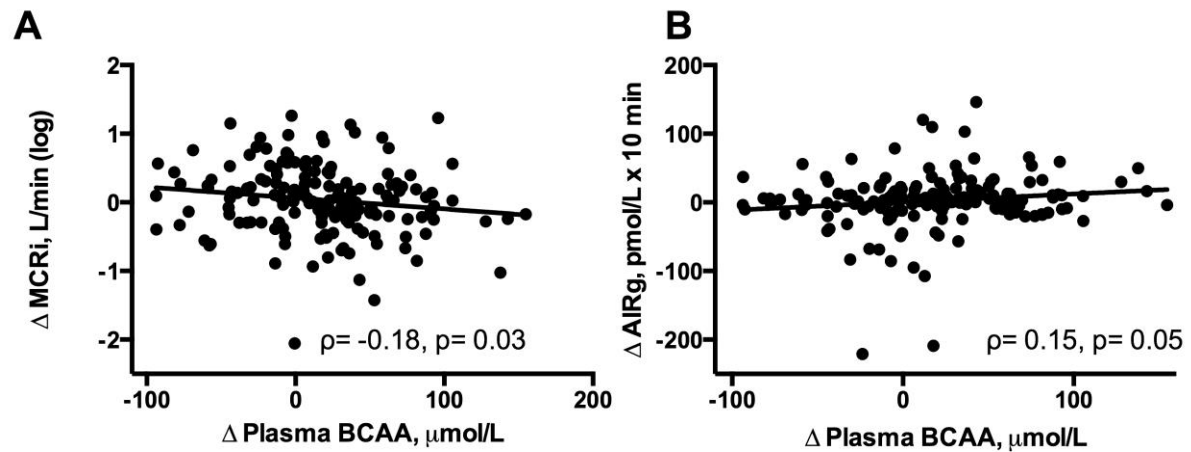

**Supplemental Figure 1:** Spearman's correlation between changes in plasma BCAA and MCRi (A) and AIRg (B) in overweight and obese adults after 4-wk of consuming diets containing different levels of protein and saturated fat. N= 158. AIRg, acute insulin response to glucose; BCAA, branched chain amino acids; MCRi, metabolic clearance of insulin.
